# Supplementary material
Source: PubMed Central journal article supplement (PMC11105386)
Supplement: 18_2019_3033_MOESM2_ESM.pdf [file 18_2019_3033_MOESM2_ESM.pdf]

Online Resource 2. Unique NONO and SFPQ peptides identified by LC-MALDI-TOF/TOF from IGFBP-3 co-immunoprecipitation experiments.

| Accession  | Range     | m/z meas. | Mr calc.  | $\Delta$ m/z [ppm] | Sequence                               | Modifications      |
|------------|-----------|-----------|-----------|--------------------|----------------------------------------|--------------------|
| NONO_HUMAN | 143 - 153 | 1248.6073 | 1247.6081 | -6.49              | R.FACHSASLTVR.N                        | Carbamidomethyl: 3 |
| NONO_HUMAN | 191 - 202 | 1231.6920 | 1230.6721 | 10.25              | K.GIVEFSGKPAAR.K                       |                    |
| NONO_HUMAN | 357 - 365 | 1263.5989 | 1262.5972 | -4.45              | R.RQQEEMMRR.Q                          |                    |
| NONO_HUMAN | 365 - 378 | 1636.8313 | 1635.8118 | 7.48               | R.RQQEGFKGTFPDAR.E                     |                    |
| NONO_HUMAN | 366 - 378 | 1480.7236 | 1479.7106 | 3.84               | R.QQEGFKGTFPDAR.E                      |                    |
| NONO_HUMAN | 384 - 398 | 1538.6691 | 1537.6622 | -0.23              | R.MGQMAMGGAMGINNR.G                    |                    |
| NONO_HUMAN | 435 - 456 | 2163.0680 | 2162.0579 | 1.31               | R.FGQAATMEGIGAIGGTPPAFNR.A             |                    |
| NONO_HUMAN | 435 - 468 | 3372.8220 | 3371.6833 | 38.96              | R.FGQAATMEGIGAIGGTPPAFNRAAPGAEFAPNKR.R |                    |
| NONO_HUMAN | 457 - 468 | 1228.6634 | 1227.6360 | 16.35              | R.AAPGAEFAPNKR.R                       |                    |
| NONO_HUMAN | 457 - 469 | 1384.7644 | 1383.7371 | 14.40              | R.AAPGAEFAPNKR.R                       |                    |
| SFPQ_HUMAN | 209 - 242 | 3165.6553 | 3164.6163 | 10.04              | K.GGKMPGGPKPGGGPGLSTPGGHKPPHRGGGEPR.G  |                    |
| SFPQ_HUMAN | 243 - 267 | 2673.3552 | 2672.2718 | 28.45              | R.GGRQHHPYHQHHQGPPPGGPGGR.S            |                    |
| SFPQ_HUMAN | 246 - 267 | 2403.1974 | 2402.1278 | 25.94              | R.QHHPYHQHHQGPPPGGPGGR.S               |                    |
| SFPQ_HUMAN | 272 - 291 | 2217.2526 | 2216.1913 | 24.35              | K.ISDSEGFKANLSLLRRPGEK.T               |                    |
| SFPQ_HUMAN | 377 - 399 | 2639.2932 | 2638.2915 | -2.10              | R.NLSPYVSNELLEAFSQFGPIER.A             |                    |
| SFPQ_HUMAN | 664 - 681 | 1727.8545 | 1726.8499 | -1.55              | R.TERFGQGAGPVGGQGPR.G                  |                    |
| SFPQ_HUMAN | 667 - 681 | 1341.6809 | 1340.6585 | 11.21              | R.FGQGGAGPVGGQGPR.G                    |                    |
| SFPQ_HUMAN | 667 - 693 | 2443.1309 | 2442.1611 | -15.34             | R.FGQGGAGPVGGQPRGMGPGTPAGYGR.G         |                    |
| SFPQ_HUMAN | 682 - 693 | 1120.5343 | 1119.5131 | 12.44              | R.GMGPAGYGR.G                          |                    |
| SFPQ_HUMAN | 694 - 706 | 1559.8141 | 1558.7852 | 13.83              | R.GREEYEGPNKKPR.F                      |                    |
| SFPQ_HUMAN | 696 - 706 | 1346.7029 | 1345.6626 | 24.47              | R.EEYEGPNKKPR.F                        |                    |
| SFPQ_HUMAN | 696 - 707 | 1493.7373 | 1492.7310 | -0.71              | R.EEYEGPNKKPRF.-                       |                    |
